# Supplementary material for: AgNO3-catalyzed decarboxylative cross-coupling reaction: an approach to coenzyme Q
Source: Royal Society of Chemistry journal article supplement (doi:10.1039/d0nj01497d), 2020-01-01
Supplement: d0nj01497d1.pdf [file d0nj01497d1.pdf]

## AgNO<sub>3</sub>-Catalyzed Decarboxylative Cross-coupling Reaction: An Approach to Coenzyme Q

Wan-Yue Luo<sup>a#</sup>, Bin Lu<sup>a#</sup>, Yong-Fu Qiu<sup>a#</sup>, Rong-Ye Zhou<sup>a</sup>, Yong-Jing He<sup>a</sup>, Jin Wang<sup>a</sup>

<sup>a</sup> School of Pharmacy, Yancheng Teachers University, Hope Avenue South Road No.2, Yancheng, 224007, Jiangsu Province, P. R. China

<sup>#</sup> Université de Toulouse, Université Toulouse III – Paul Sabatier, 118 route de Narbonne, 31062 Toulouse Cedex 9, France

### Experimental Procedures

All reactions were monitored by TLC (SiO<sub>2</sub>, petrol ether/EtOAc 5:1), Melting points were measured on Melting Point M-565 (BUCHI). NMR and mass spectra were recorded on a Bruker Avanc III-HD 400 NMR and a TripleTOF Mass spectrometers, respectively. All reagents: e.g. Potassium Persulfate (K<sub>2</sub>S<sub>2</sub>O<sub>8</sub>), Ammonium persulphate ((NH<sub>4</sub>)<sub>2</sub>S<sub>2</sub>O<sub>8</sub>) were purchased from Adamas, P. R. China, and used without further purification.

Table 1. Control experiments

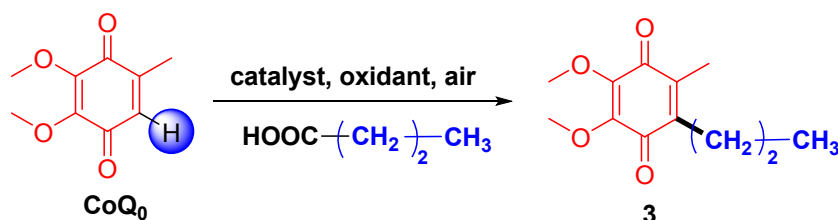

| Entry | Oxidant                                                       | Catalyst                        | Solvent            | Yield (%) |
|-------|---------------------------------------------------------------|---------------------------------|--------------------|-----------|
| 1     | K <sub>2</sub> S <sub>2</sub> O <sub>8</sub>                  | Ag <sub>2</sub> CO <sub>3</sub> | CH <sub>3</sub> CN | 10        |
| 2     | K <sub>2</sub> S <sub>2</sub> O <sub>8</sub>                  | Ag <sub>2</sub> O               | CH <sub>3</sub> CN | 8         |
| 3     | K <sub>2</sub> S <sub>2</sub> O <sub>8</sub>                  | AgOAc                           | CH <sub>3</sub> CN | 14        |
| 4     | (NH <sub>4</sub> ) <sub>2</sub> S <sub>2</sub> O <sub>8</sub> | AgNO <sub>3</sub>               | CH <sub>3</sub> CN | 25        |
| 5     | H <sub>2</sub> O <sub>2</sub>                                 | AgNO <sub>3</sub>               | CH <sub>3</sub> CN | 0         |
| 6     | TBHP                                                          | AgNO <sub>3</sub>               | CH <sub>3</sub> CN | trace     |
| 7     | TBPB                                                          | AgNO <sub>3</sub>               | CH <sub>3</sub> CN | 12        |
| 8     | DTBP                                                          | AgNO <sub>3</sub>               | CH <sub>3</sub> CN | trace     |
| 9     | TBPB                                                          | Bi(OTf) <sub>3</sub>            | CH <sub>3</sub> CN | 0         |
| 10    | TBPB                                                          | Cu(OAc) <sub>2</sub>            | CH <sub>3</sub> CN | trace     |
| 11    | TBPB                                                          | Pd(OAc) <sub>2</sub>            | CH <sub>3</sub> CN | trace     |

Reaction Conditions: CoQ<sub>0</sub> (0.02 mol), butanoic acid (1.2 equiv), Catalyst 40%, Oxidant 2 equiv (DTBP: *di*-tertbutyl peroxide. TBHP = *tert*-butyl hydroperoxide, TBPB = *tert*-butyl peroxybenzoate). 80 °C, 4h

---

## Synthesis of CoQ compounds

To a solution of Coenzyme Q<sub>0</sub> (3.64 g, 0.02 mol) and carboxylic acids (0.03mol) in acetonitrile 80 mL was added AgNO<sub>3</sub> (1.35 g, 8 mmol). The mixture was heated to 80 °C and a solution of K<sub>2</sub>S<sub>2</sub>O<sub>8</sub> (10.81 g, 0.04 mol) in distilled water 80 mL was added dropwise over 2 h, then the reaction mixture was stirred for another 2 h, with TLC monitoring until the starting material was consumed. The resulting mixture was cooled and extracted with CH<sub>2</sub>Cl<sub>2</sub>. The organic layer was washed with water, then dried over anhydrous Na<sub>2</sub>SO<sub>4</sub> and evaporated under reduced pressure. The residue was purified by column chromatograph on silica gel (PE/EtOAc= 5:1) to give CoQ compounds.

### Compound **3**, red oil;

<sup>1</sup>H NMR (400 MHz, CDCl<sub>3</sub>) δ 3.99 (s, 3H, OCH<sub>3</sub>), 3.98 (s, 3H, OCH<sub>3</sub>), 2.45 (t, 2H, *J* = 8.0 Hz, CH<sub>2</sub>), 2.02 (s, 3H, CH<sub>3</sub>), 1.39-1.49 (m, 2H, CH<sub>2</sub>), 0.96 (t, *J* = 8.0 Hz, 3H, CH<sub>3</sub>).

<sup>13</sup>C NMR (101 MHz, CDCl<sub>3</sub>) δ 184.7 (C=O), 184.2 (C=O), 144.3, 144.2, 142.8, 138.9, 61.2(OCH<sub>3</sub>), 28.3, 22.1, 14.3, 11.9 (CH<sub>3</sub>).

### Compound **4**, red oil;

<sup>1</sup>H NMR (400 MHz, CDCl<sub>3</sub>) δ 4.00 (s, 3H, OCH<sub>3</sub>), 3.99 (s, 3H, OCH<sub>3</sub>), 2.45 (t, 2H, *J* = 8.0 Hz, CH<sub>2</sub>), 2.01 (s, 3H, CH<sub>3</sub>), 1.15-1.45 (m, 14H, CH<sub>2</sub>), 0.88 (t, *J* = 8.0 Hz, 3H, CH<sub>3</sub>).

<sup>13</sup>C NMR (101 MHz, CDCl<sub>3</sub>) δ 184.7 (C=O), 184.2 (C=O), 144.3, 144.2, 143.1, 138.6, 61.2 (OCH<sub>3</sub>), 31.9, 29.8, 29.5, 29.4, 29.3, 28.7, 26.4, 22.7, 14.1, 11.9 (CH<sub>3</sub>).

### Compound **5**, red oil<sup>[1]</sup>;

<sup>1</sup>H NMR (400MHz, CDCl<sub>3</sub>) δ 3.91 (s, 6H, OCH<sub>3</sub>), 3.55 (t, *J* = 8.0Hz, 2H, CH<sub>2</sub>OH), 2.52 (s, 1H, OH), 2.36 (t, *J* = 8.0Hz, 2H), 2.00 (s, 3H, CH<sub>3</sub>), 1.48(t, *J* = 8.0Hz, 2H), 1.10-1.45 (m, 14H).

<sup>13</sup>CNMR (100MHz, (CD<sub>3</sub>)<sub>2</sub>CO) δ 184.5 (C=O), 183.9 (C=O), 144.0, 142.8(2C), 138.5, 62.6(OCH<sub>3</sub>), 60.9(OCH<sub>3</sub>), 32.5, 29.6, 29.2, 29.1, 29.0, 28.5, 26.2, 25.5, 11.7 (CH<sub>3</sub>).

Idebenone (compound **6**), red solid, m.p. 53-55 °C (Lit. <sup>[2]</sup> 52-54 °C).

<sup>1</sup>H NMR (400 MHz, CDCl<sub>3</sub>) δ 4.00 (s, 3H, OCH<sub>3</sub>), 3.99 (s, 3H, OCH<sub>3</sub>), 3.62-3.66 (m, 2H, CH<sub>2</sub>), 2.45 (t, 2H, *J* = 8.0 Hz, CH<sub>2</sub>), 2.01 (s, 3H, CH<sub>3</sub>), 1.61 (s, 1H, OH), 1.59-1.52 (m, 2H), 1.42-1.22 (m, 14H);

$^{13}\text{C}$ NMR (100 MHz,  $\text{CDCl}_3$ )  $\delta$  184.7 (C=O), 184.2 (C=O), 144.3, 144.2, 143.1, 138.7, 63.1(OCH<sub>3</sub>), 61.2(OCH<sub>3</sub>), 32.8, 29.8, 29.5, 29.4, 29.3, 28.7, 26.4, 25.7, 11.9 (CH<sub>3</sub>).

## References

- [1] J. Wang, S. Li, T. Yang and J. Yang, *European Journal of Medicinal Chemistry*, 2014, 86, 710-713  
[2] J. Wang, S. Li, T. Yang and J. Yang, *Tetrahedron*, 2014, 70, 9029-9032.

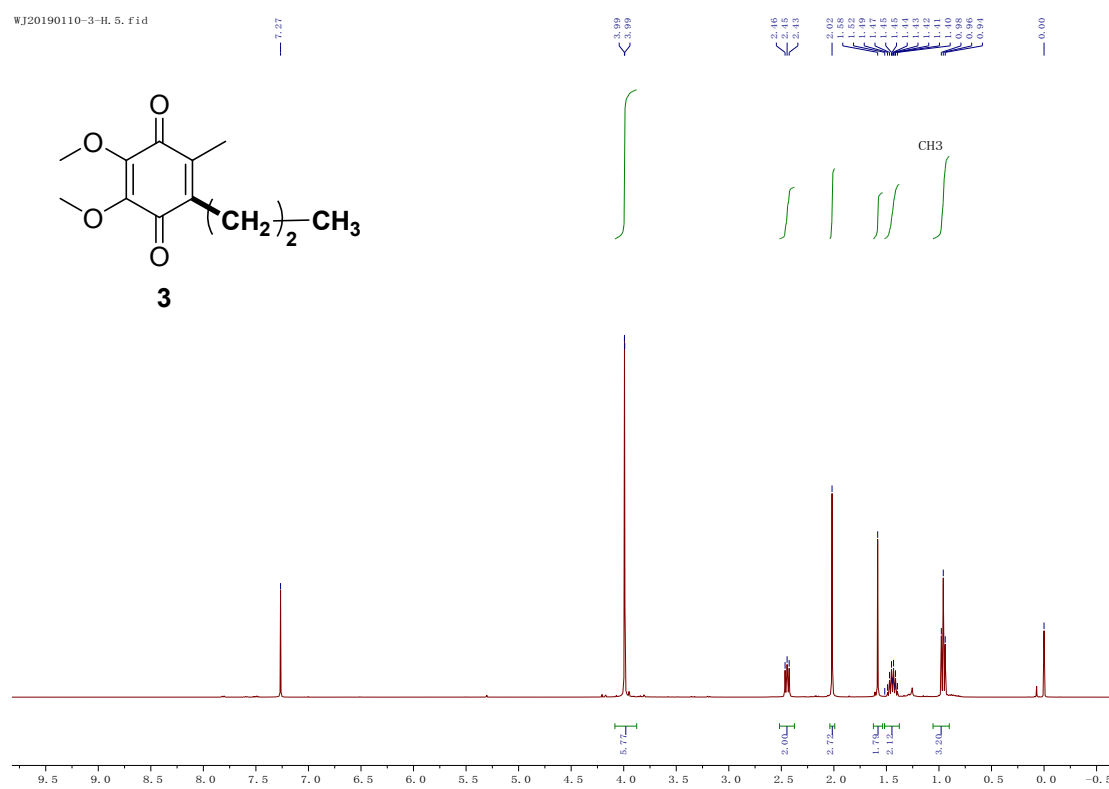

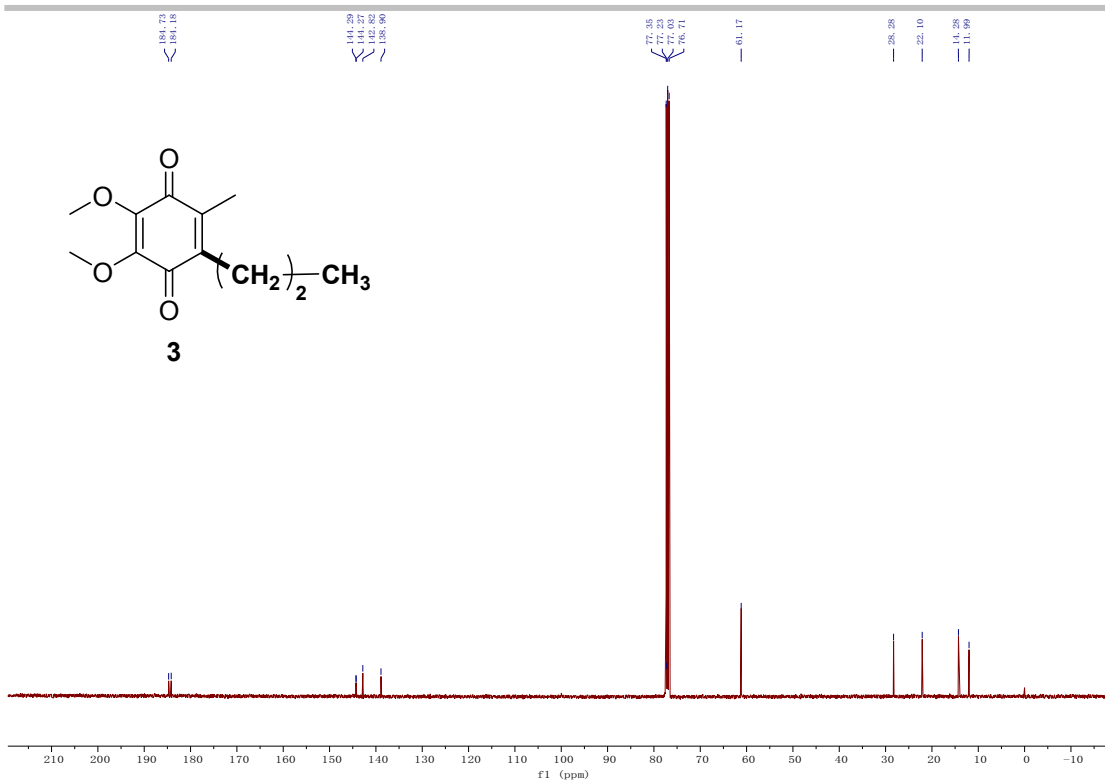

$^{13}\text{C}$  NMR spectrum of compound **3**

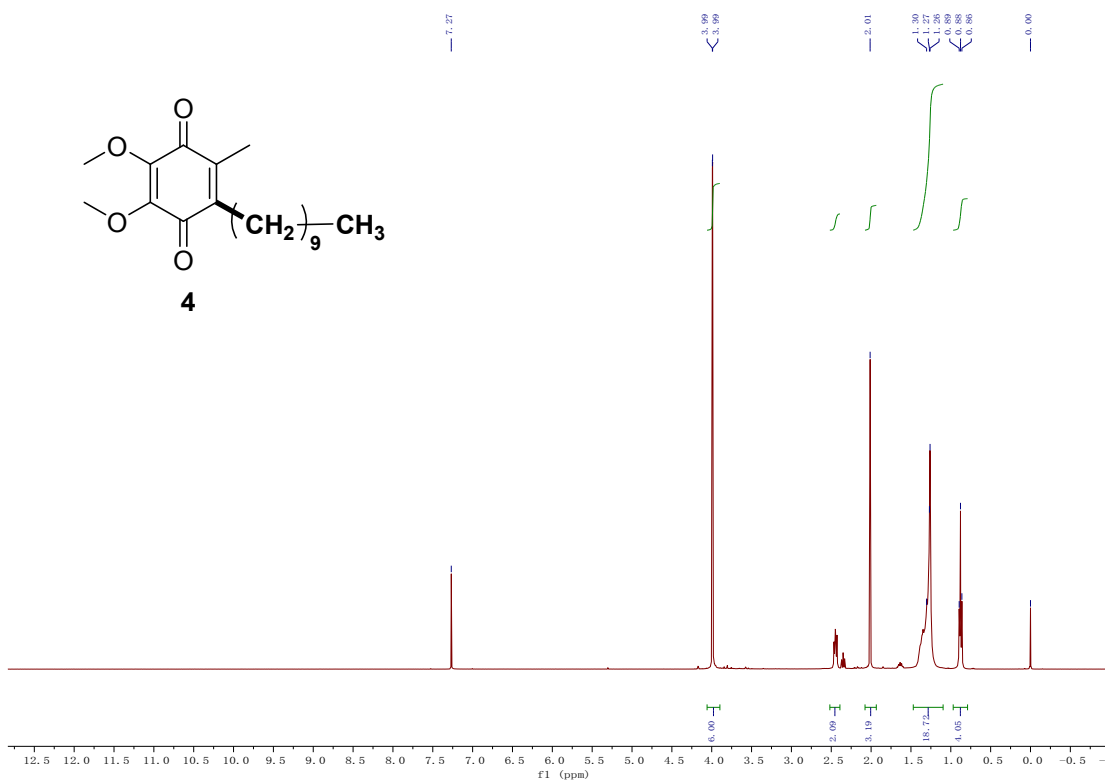

$^1\text{H}$  NMR spectrum of compound **4**

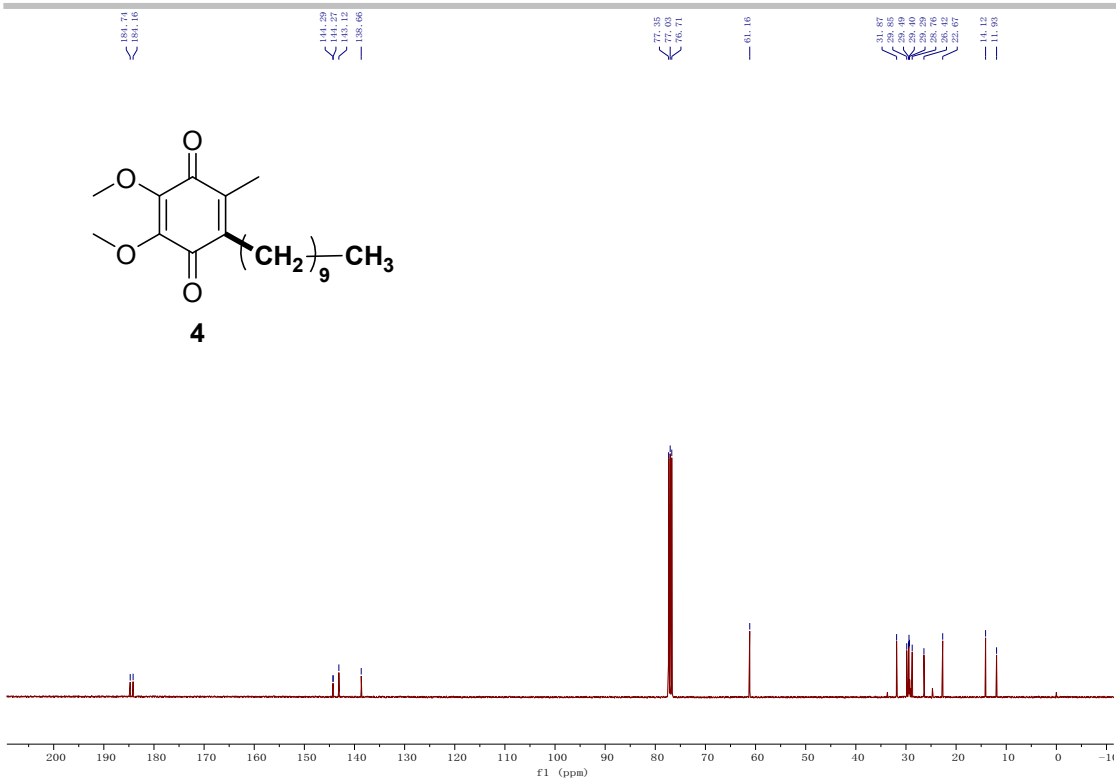

**13C NMR spectrum of compound 4**

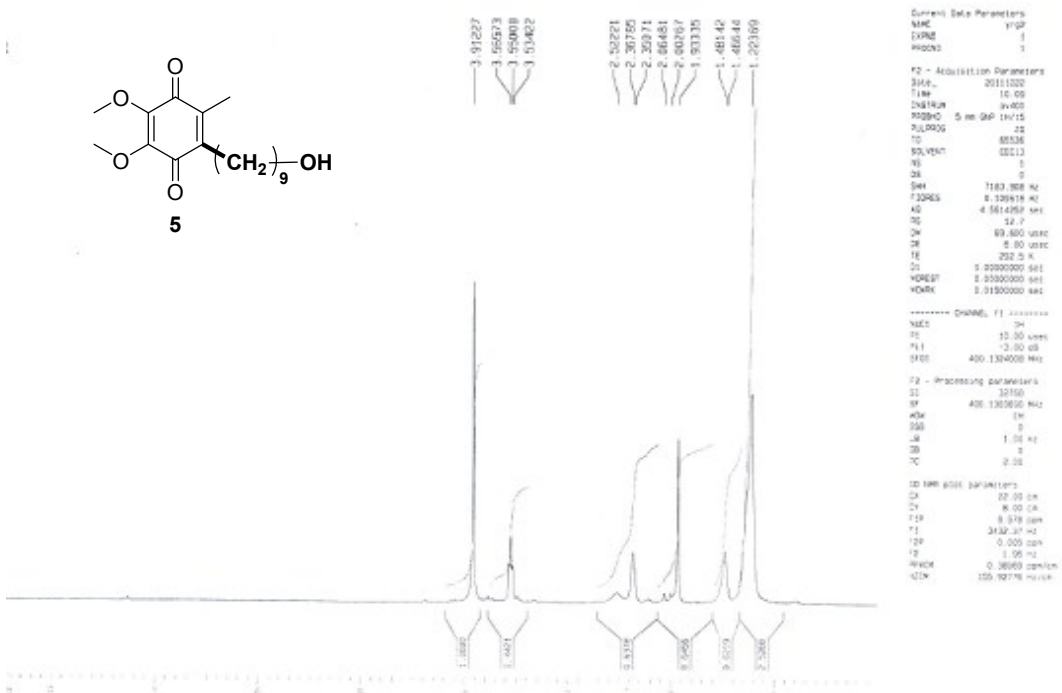

**1H NMR spectrum of compound 5**

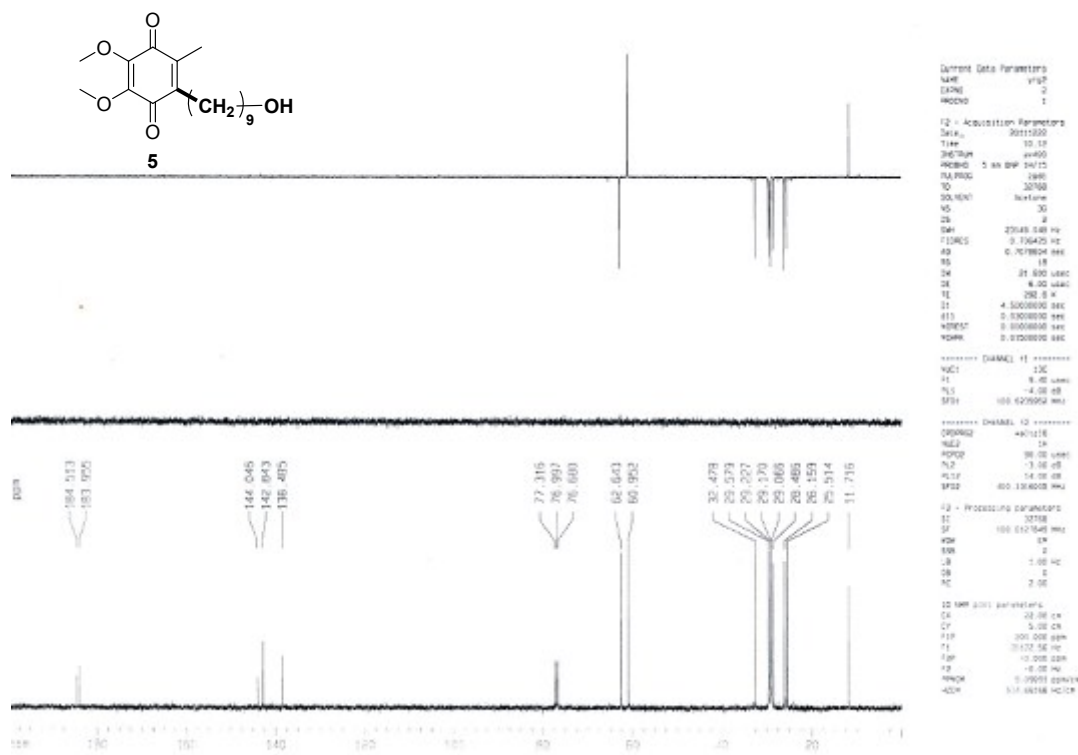

<sup>13</sup>C NMR spectrum of compound 5

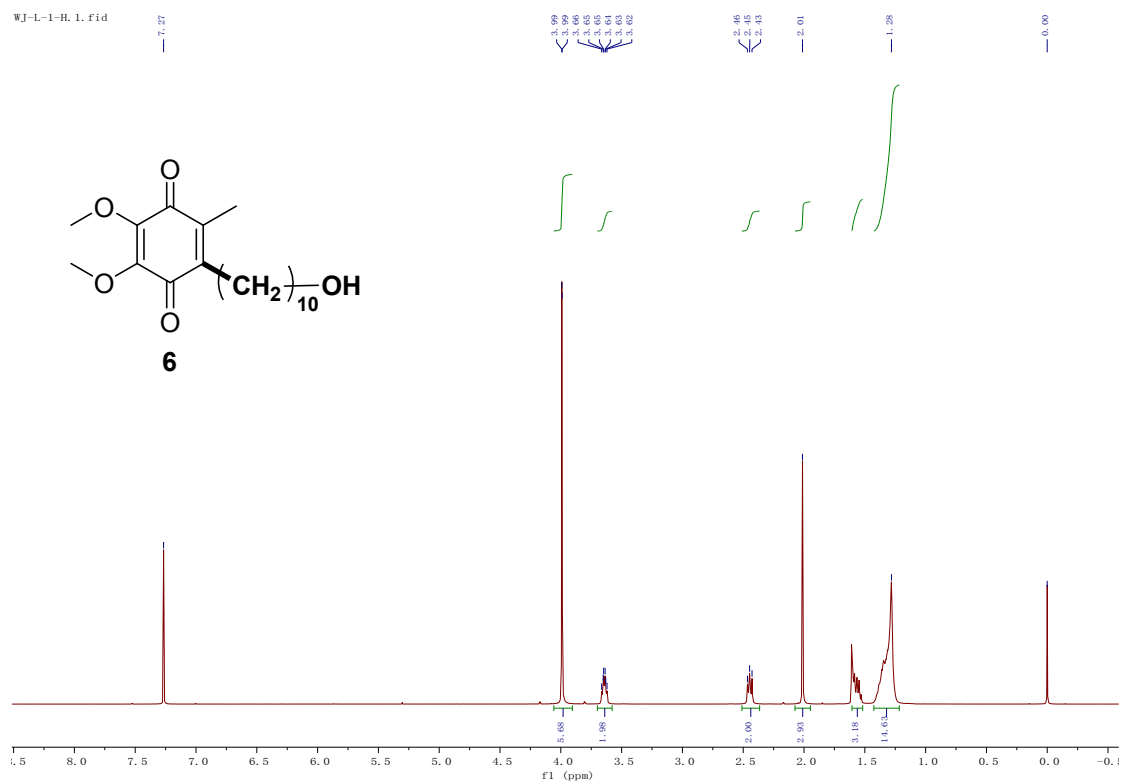

<sup>1</sup>H NMR spectrum of idebenone (6)

WJ-L-1-C, 2.fid

181.73  
181.17

144.29  
144.26  
143.09  
138.68

77.35  
77.23  
76.71

61.18  
61.18

32.80  
29.81  
29.71  
29.59  
29.38  
29.22  
28.72  
28.40  
28.71

11.94

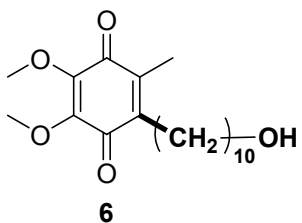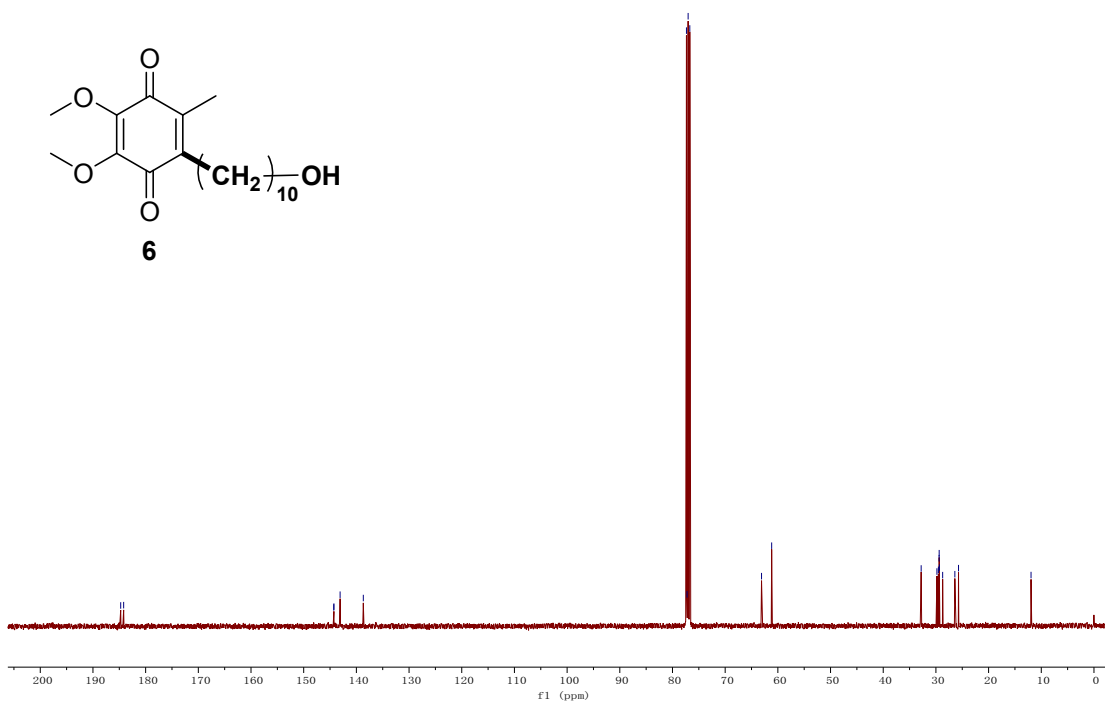

<sup>13</sup>C NMR spectrum of idebenone (6)
